# Supplementary material
Source: PubMed Central journal article supplement (PMC4151785)
Supplement: es5020554_si_001.pdf [file es5020554_si_001.pdf]

Supporting Information for

## **Mercury Isotope Study of Sources and Exposure Pathways of Methylmercury in Estuarine Food Webs in the Northeastern U.S**

Sae Yun Kwon <sup>1\*</sup>, Joel D Blum <sup>1</sup>, Celia Y Chen<sup>2</sup>, Dustin E Meatey<sup>3</sup>, Robert P Mason<sup>4</sup>

<sup>1</sup> Department of Earth and Environmental Sciences, University of Michigan, 1100 N. University Ave, Ann Arbor, Michigan 48109, United States

<sup>2</sup> Department of Biological Sciences, Dartmouth College, 78 College St, Hanover, New Hampshire 03755-3576, United States

<sup>3</sup> Biodiversity Research Institute, 652 Main St, Gorham, Maine 04038, United States

<sup>4</sup> Department of Marine Science, University of Connecticut, 1080 Shennecossett Rd, Groton, Connecticut 06340, United States

Keywords: methylmercury, estuaries, food web, mussels, birds, stable Hg isotope

\* Corresponding author: Sae Yun Kwon

Tel.: 1.734.615.7209

Fax 1.734.763.4690

Email: saeyunk@umich.edu

Page number: 4

Figure S1

Table S1

### Figure captions

Figure 1S. Map of the Northeast coast, USA representing the sampling locations (Maine; ME, Massachusetts; MA, Rhode Island, RI; Connecticut, CT, New Jersey; NJ). Aquatic biota were sampled at sites indicated in black circles. Birds were sampled at three locations in ME and MA and are represented with white circles. This map has been modified from *nationalatlas.gov*.

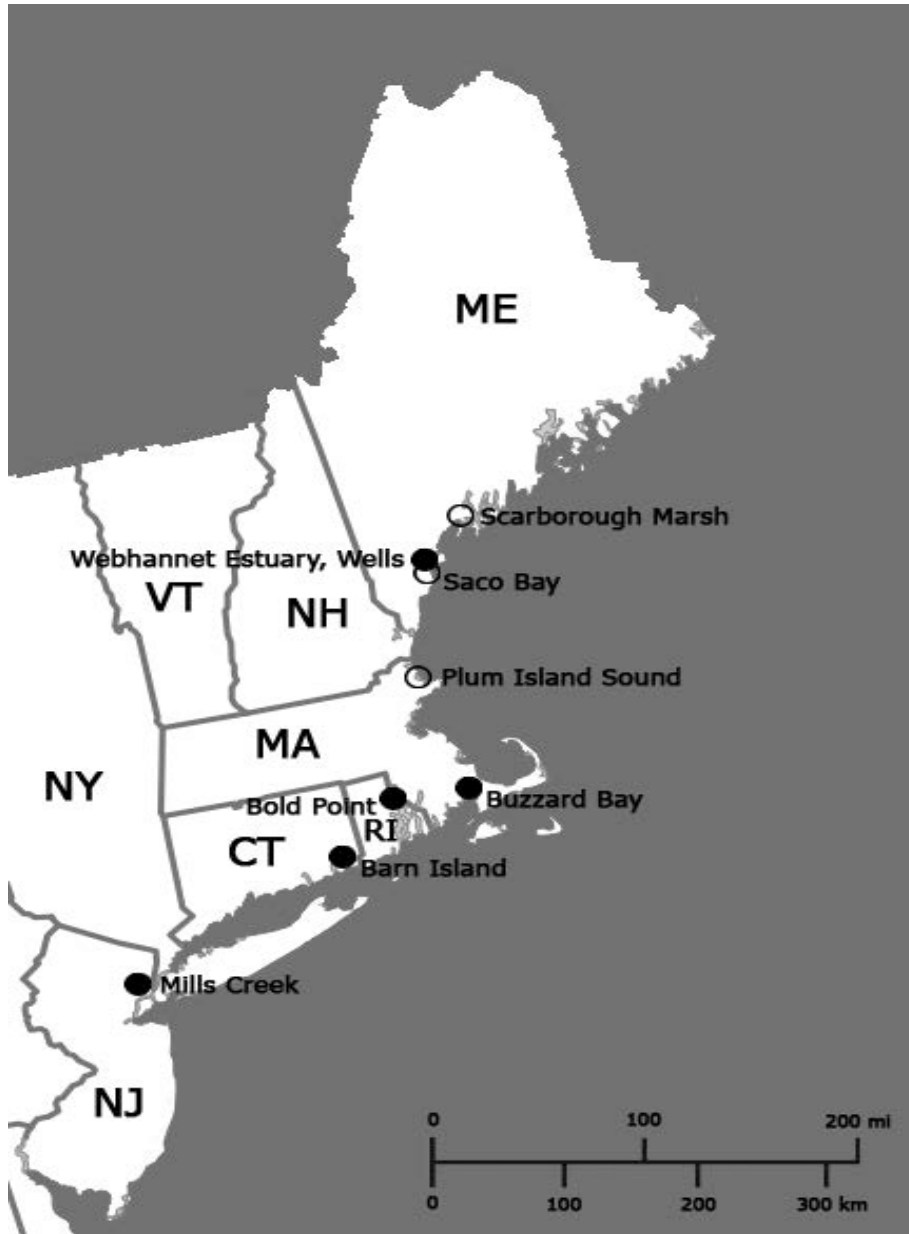

Table 1. THg concentrations (ng/g), % MMHg, stable carbon and nitrogen values and Hg isotope ratios of all sediment and estuarine biotas.

|                                                                                          | THg (ng/g) | % MMHg      | $\delta^{15}\text{N}$ (‰) | $\delta^{13}\text{C}$ (‰) | $\delta^{202}\text{Hg}$ (‰) | $\Delta^{201}\text{Hg}$ (‰) | $\Delta^{199}\text{Hg}$ (‰) |
|------------------------------------------------------------------------------------------|------------|-------------|---------------------------|---------------------------|-----------------------------|-----------------------------|-----------------------------|
| <b><i>Sediment</i></b>                                                                   |            |             |                           |                           |                             |                             |                             |
| WELLS, ME                                                                                | 9.43       | 2.96        |                           |                           | -0.67                       | 0.09                        | 0.19                        |
|                                                                                          | 9.43       | 2.96        |                           |                           | -0.63                       | 0.02                        | 0.10                        |
| BUZZ, MA                                                                                 | 5.70       | 1.74        |                           |                           | -0.89                       | 0.17                        | 0.10                        |
| BOLD, RI                                                                                 | 221        | 0.20        |                           |                           | -0.82                       | 0.01                        | 0.01                        |
|                                                                                          | 221        | 0.20        |                           |                           | -0.60                       | 0.01                        | 0.02                        |
| BARN, CT                                                                                 | 42.0       | 0.13        |                           |                           | -0.72                       | 0.15                        | -0.01                       |
|                                                                                          | 42.0       | 0.13        |                           |                           | -0.77                       | 0.18                        | 0.02                        |
| MILL, NJ                                                                                 | 2962       | 0.32        |                           |                           | -0.40                       | 0.01                        | -0.02                       |
|                                                                                          | 2962       | 0.32        |                           |                           | -0.38                       | 0.02                        | -0.04                       |
| <b><i>Mussel</i></b> <i>Filter feeder; particulate organic matter</i>                    |            |             |                           |                           |                             |                             |                             |
| WELLS, ME                                                                                | 109        | 58.7        | 6.16                      | -19.60                    | -0.20                       | 0.09                        | 0.41                        |
| BUZZ, MA                                                                                 | 187        | 53.4        | 8.43                      | -18.67                    | 0.03                        | 0.02                        | 0.47                        |
|                                                                                          | 169        |             |                           |                           | 0.00                        | 0.23                        | 0.40                        |
| BOLD, RI                                                                                 | 192        | 63.9        | 7.80                      | -18.97                    | 0.77                        | 0.06                        | 0.52                        |
|                                                                                          | 61.2       |             |                           |                           | 0.34                        | 0.27                        | 0.33                        |
| BARN, CT                                                                                 | 190        | 56.1        | 7.08                      | -20.08                    | -0.23                       | 0.04                        | 0.32                        |
|                                                                                          | 113        |             |                           |                           | -0.31                       | 0.12                        | 0.21                        |
| <i>average</i>                                                                           | <i>146</i> | <i>58.0</i> | <i>7.37</i>               | <i>-19.33</i>             | <i>0.06</i>                 | <i>0.12</i>                 | <i>0.38</i>                 |
| <b><i>Crab</i></b> <i>Epibenthic consumer; benthic microalgae, benthic invertebrates</i> |            |             |                           |                           |                             |                             |                             |
| WELLS, ME                                                                                | 68.1       | 80.0        | 9.37                      | -16.78                    | -0.39                       | 0.03                        | 0.68                        |
|                                                                                          | 26.4       |             |                           |                           | -0.45                       | 0.45                        | 0.57                        |
| BUZZ, MA                                                                                 | 58.3       | 86.5        | 7.83                      | -14.72                    | 0.15                        | 0.05                        | 0.87                        |
|                                                                                          | 84.6       |             |                           |                           | 0.01                        | 0.72                        | 0.82                        |

|                |             |             |              |               |              |             |             |
|----------------|-------------|-------------|--------------|---------------|--------------|-------------|-------------|
| BOLD, RI       | 68.3        | 84.6        | 13.54        | -18.26        | 0.05         | 0.03        | 0.39        |
|                | 25.8        |             |              |               | -0.05        | 0.45        | 0.23        |
| <i>average</i> | <i>55.3</i> | <i>83.7</i> | <i>10.25</i> | <i>-16.59</i> | <i>-0.11</i> | <i>0.29</i> | <i>0.59</i> |

**Fish** *Epibenthic/water column consumer; zooplankton, microalgae, benthic invertebrates, detritus*

|                |            |             |              |               |              |             |             |
|----------------|------------|-------------|--------------|---------------|--------------|-------------|-------------|
| WELLS, ME      | 67.4       | 91.7        | 8.99         | -14.87        | -0.20        | 0.70        | 0.91        |
|                | 25.5       | 91.3        | 7.80         | -14.95        | -0.24        | 0.75        | 0.84        |
| BUZZ, MA       | 96.5       | 77.3        | 9.84         | -16.12        | 0.19         | 0.77        | 0.98        |
|                | 122        | 94.1        | 11.68        | -16.38        | -0.10        | 0.73        | 0.87        |
| BOLD, RI       | 79.4       | 95.8        | 15.70        | -16.07        | 0.19         | 0.54        | 0.72        |
|                | 45.2       | 93.8        | 15.78        | -16.58        | 0.23         | 0.63        | 0.67        |
| BARN, CT       | 120        | 93.1        | 10.02        | -16.13        | -0.34        | 0.33        | 0.44        |
|                | 54.5       | 88.1        | 7.80         | -17.14        | -0.05        | 0.46        | 0.60        |
| MILL, NJ       | 631        | 97.3        | 13.91        | -24.02        | 0.07         | 0.29        | 0.37        |
| <i>average</i> | <i>138</i> | <i>91.4</i> | <i>11.28</i> | <i>-16.92</i> | <i>-0.03</i> | <i>0.58</i> | <i>0.71</i> |

**Bird** *Epibenthic and water column consumer; bivalves, mollusks, crustaceans, fish*

|                |                    |             |               |               |             |             |             |
|----------------|--------------------|-------------|---------------|---------------|-------------|-------------|-------------|
| WELLS, ME      | 208 <sup>SA</sup>  |             |               |               | 0.71        | 0.59        | 0.74        |
|                | 363 <sup>SA</sup>  |             |               |               | 0.84        | 0.63        | 0.82        |
|                | 453 <sup>SC</sup>  |             |               |               | 1.39        | 0.46        | 0.62        |
| BUZZ, MA       | 1755 <sup>PL</sup> |             |               |               | 0.70        | 0.46        | 0.66        |
|                | 1536 <sup>PL</sup> |             |               |               | 0.59        | 0.51        | 0.68        |
| <i>average</i> | <i>863</i>         | <i>(98)</i> | <i>(13.2)</i> | <i>(17.4)</i> | <i>0.85</i> | <i>0.53</i> | <i>0.70</i> |

Detailed feeding strategies are found in Chen et al<sup>12,13</sup>.

Values in bracket are derived from Wayland et al<sup>42</sup>, and Hobson et al<sup>45</sup>.

SA, SC, and PL refer to Saco Bay, ME, Scarborough Marsh, ME, and Plum Island Sound, MA, respectively.
